# Supplementary material for: Safety of Early Discontinuation of Antiseizure Medication After Acute Symptomatic Neonatal Seizures
Source: PubMed Central journal article supplement (PMC8145161; doi:10.1001/jamaneurol.2021.1437), 2021-05-24

## Supplemental Online Content

Glass HC, Soul JS, Chang T, et al. Safety of early discontinuation of antiseizure medication after acute symptomatic neonatal seizures. *JAMA Neurol*. Published online May 24, 2021. doi:10.1001/jamaneurol.2021.1437

**eTable 1.** Balance of Participant Characteristic Between Groups Within Quintiles of the Propensity Score for 303 Children Whose Antiseizure Medications Were Discontinued vs Maintained After Resolution of Acute Symptomatic Neonatal Seizures and Before Hospital Discharge

**eTable 2.** Characteristics of Children Lost to Follow-up as Compared to Survivors of Acute Symptomatic Neonatal Seizures With One or More Follow-up Evaluations

**eFigure.** Overlaid Density Plots of Propensity Scores by Quintile for 303 Infants Whose Antiseizure Medications Were Discontinued vs Maintained Upon Discharge From the Neonatal Seizure Admission

This supplemental material has been provided by the authors to give readers additional information about their work.

**eTable 1:** Balance of participant characteristic between groups within quintiles of the propensity score for 303 children whose antiseizure medications were discontinued vs. maintained after resolution of acute symptomatic neonatal seizures and before hospital discharge.

| Propensity Score Quintiles                                                          | Quintile 1            |                     | Quintile 2            |                     | Quintile 3            |                     | Quintile 4            |                     | Quintile 5           |                     |
|-------------------------------------------------------------------------------------|-----------------------|---------------------|-----------------------|---------------------|-----------------------|---------------------|-----------------------|---------------------|----------------------|---------------------|
|                                                                                     | ASM Discontinued N=43 | ASM Maintained N=17 | ASM Discontinued N=25 | ASM Maintained N=37 | ASM Discontinued N=16 | ASM Maintained N=42 | ASM Discontinued N=18 | ASM Maintained N=44 | ASM Discontinued N=8 | ASM Maintained N=53 |
| <i>Clinical Characteristics</i>                                                     |                       |                     |                       |                     |                       |                     |                       |                     |                      |                     |
| Gestational age at birth <sup>a</sup> , No. (%)                                     |                       |                     |                       |                     |                       |                     |                       |                     |                      |                     |
| - <28 weeks                                                                         | 4 (9%)                | 2 (12%)             | 1 (4%)                | 0 (0%)              | 0 (0%)                | 1 (2%)              | 0 (0%)                | 1 (2%)              | 0 (0%)               | 0 (0%)              |
| -28- <32 weeks                                                                      | 3 (7%)                | 0 (0%)              | 0 (0%)                | 1 (3%)              | 0 (0%)                | 0 (0%)              | 0 (0%)                | 1 (2%)              | 0 (0%)               | 0 (0%)              |
| -32- <37 weeks                                                                      | 1 (2%)                | 1 (6%)              | 1 (4%)                | 3 (8%)              | 1 (6%)                | 0 (0%)              | 1 (6%)                | 7 (16%)             | 3 (38%)              | 17 (32%)            |
| - ≥37 weeks                                                                         | 35 (81%)              | 14 (82%)            | 23 (92%)              | 33 (89%)            | 15 (94%)              | 41 (98%)            | 17 (94%)              | 35 (80%)            | 5 (62%)              | 36 (68%)            |
| Male, No. (%)                                                                       | 19 (44%)              | 8 (47%)             | 14 (56%)              | 21 (57%)            | 12 (75%)              | 23 (55%)            | 9 (50%)               | 30 (68%)            | 5 (62%)              | 29 (55%)            |
| 5-minute Apgar score, median (IQR)                                                  | 5 (3,6)               | 5 (3,6)             | 8 (5,9)               | 7 (3,9)             | 9 (7,9)               | 9 (7,9)             | 6 (5,9)               | 9 (8,9)             | 7 (5,9)              | 8 (6,9)             |
| <i>Seizure and EEG Characteristics</i>                                              |                       |                     |                       |                     |                       |                     |                       |                     |                      |                     |
| Seizure etiology <sup>a</sup> , No. (%)                                             |                       |                     |                       |                     |                       |                     |                       |                     |                      |                     |
| -HIE                                                                                | 30 (70%)              | 14 (82%)            | 13 (52%)              | 22 (59%)            | 4 (25%)               | 10 (24%)            | 7 (39%)               | 11 (25%)            | 4 (50%)              | 15 (28%)            |
| -Ischemic stroke                                                                    | 4 (9%)                | 1 (6%)              | 3 (12%)               | 3 (8%)              | 6 (38%)               | 22 (52%)            | 9 (50%)               | 15 (34%)            | 1 (12%)              | 16 (30%)            |
| -ICH                                                                                | 4 (9%)                | 2 (12%)             | 4 (16%)               | 5 (14%)             | 6 (38%)               | 6 (14%)             | 2 (11%)               | 14 (32%)            | 1 (12%)              | 11 (21%)            |
| -Other                                                                              | 5 (12%)               | 0 (0%)              | 5 (20%)               | 7 (19%)             | 0 (0%)                | 4 (10%)             | 0 (0%)                | 4 (9%)              | 2 (25%)              | 11 (21%)            |
| Worst EEG background (1 <sup>st</sup> 24hrs at study center) <sup>a</sup> , No. (%) |                       |                     |                       |                     |                       |                     |                       |                     |                      |                     |
| -Normal                                                                             | 11 (26%)              | 2 (12%)             | 3 (12%)               | 4 (11%)             | 0 (0%)                | 3 (7%)              | 0 (0%)                | 1 (2%)              | 0 (0%)               | 1 (2%)              |
| -Mild/moderately abnormal                                                           | 29 (67%)              | 11 (65%)            | 20 (80%)              | 26 (70%)            | 14 (89%)              | 31 (74%)            | 10 (56%)              | 29 (66%)            | 3 (38%)              | 27 (51%)            |
| -Severely abnormal                                                                  | 2 (5%)                | 3 (18%)             | 2 (8%)                | 6 (16%)             | 1 (6%)                | 5 (12%)             | 6 (33%)               | 8 (18%)             | 3 (38%)              | 16 (30%)            |
| -Status epilepticus                                                                 | 1 (2%)                | 1 (6%)              | 0 (0%)                | 1 (3%)              | 1 (6%)                | 3 (7%)              | 2 (11%)               | 6 (14%)             | 2 (25%)              | 7 (13%)             |
| -Cannot assess                                                                      | 0 (0%)                | 0 (0%)              | 0 (0%)                | 0 (0%)              | 0 (0%)                | 0 (0%)              | 0 (0%)                | 0 (0%)              | 0 (0%)               | 2 (4%)              |
| EEG seizure frequency (at the study center), No. (%)                                |                       |                     |                       |                     |                       |                     |                       |                     |                      |                     |
| -None                                                                               | 16 (37%)              | 3 (18%)             | 6 (24%)               | 4 (11%)             | 3 (19%)               | 12 (29%)            | 0 (0%)                | 3 (7%)              | 1 (12%)              | 4 (8%)              |
| -Few (<7)                                                                           | 17 (40%)              | 7 (41%)             | 9 (36%)               | 16 (43%)            | 2 (12%)               | 11 (26%)            | 5 (28%)               | 8 (18%)             | 2 (25%)              | 6 (11%)             |
| -Many isolated (≥7)                                                                 | 8 (19%)               | 5 (29%)             | 6 (24%)               | 7 (19%)             | 4 (25%)               | 10 (24%)            | 3 (17%)               | 6 (14%)             | 0 (0%)               | 9 (17%)             |
| -Frequent recurrent                                                                 | 0 (0%)                | 0 (0%)              | 3 (12%)               | 8 (22%)             | 5 (31%)               | 5 (12%)             | 6 (33%)               | 19 (43%)            | 1 (12%)              | 17 (32%)            |
| -Status Epilepticus                                                                 | 2 (5%)                | 2 (12%)             | 1 (4%)                | 1 (3%)              | 2 (12%)               | 4 (10%)             | 4 (22%)               | 8 (18%)             | 4 (50%)              | 17 (32%)            |
| -Documentation inadequate                                                           | 0 (0%)                | 0 (0%)              | 0 (0%)                | 1 (3%)              | 0 (0%)                | 0 (0%)              | 0 (0%)                | 0 (0%)              | 0 (0%)               | 0 (0%)              |
| Days of EEG seizures <sup>a</sup> , median (IQR)                                    | 1 (0,1)               | 1 (1,2)             | 1 (1,1)               | 1 (1,2)             | 1 (1,2)               | 1 (0,2)             | 2 (2,2)               | 2 (1,3)             | 1 (1,2)              | 2 (1,3)             |

|                                                                    |          |          |          |          |          |          |          |          |         |          |
|--------------------------------------------------------------------|----------|----------|----------|----------|----------|----------|----------|----------|---------|----------|
| Incomplete response to initial loading dose of medication, No. (%) | 14 (33%) | 6 (35%)  | 13 (52%) | 22 (59%) | 12 (75%) | 26 (62%) | 14 (78%) | 33 (75%) | 6 (75%) | 41 (77%) |
| <i>Clinical course</i>                                             |          |          |          |          |          |          |          |          |         |          |
| Therapeutic hypothermia <sup>a</sup> , No. (%)                     | 31 (72%) | 14 (82%) | 3 (12%)  | 13 (35%) | 3 (19%)  | 6 (14%)  | 8 (44%)  | 5 (11%)  | 0 (0%)  | 4 (7%)   |
| Abnormal neurologic exam at discharge <sup>a</sup> , No. (%)       | 2 (5%)   | 0 (0%)   | 2 (8%)   | 6 (16%)  | 3 (19%)  | 12 (29%) | 7 (38%)  | 13 (30%) | 6 (75%) | 44 (83%) |

<sup>a</sup> indicates variables that were included in the propensity score.

**ASM** antiseizure medication; **HIE** hypoxic-ischemic encephalopathy; **ICH** intracranial hemorrhage; **EEG** electroencephalogram

**eTable 2.** Characteristics of children lost to follow-up as compared to survivors of acute symptomatic neonatal seizures with one or more follow-up evaluations.

|                                                                                                      | Total<br>N=299 | Lost to f/u 17<br>(6%) | +f/u<br>evaluation<br>282 (94%) | p-value |
|------------------------------------------------------------------------------------------------------|----------------|------------------------|---------------------------------|---------|
| <i>Clinical Characteristics</i>                                                                      |                |                        |                                 |         |
| Term, No. (%)                                                                                        | 251 (84%)      | 13 (76%)               | 238 (84%)                       | 0.3     |
| Male, No. (%)                                                                                        | 168 (56%)      | 12 (71%)               | 156 (55%)                       | 0.2     |
| 5-minute Apgar score, median (IQR)                                                                   | 8 (5, 9)       | 8 (6, 9)               | 8 (5,9)                         | 0.9     |
| NICU at the time of seizure evaluation, No. (%)                                                      | 267 (89%)      | 15 (88%)               | 252 (89%)                       | 0.9     |
| <i>Seizure and EEG Characteristics</i>                                                               |                |                        |                                 |         |
| Seizure etiology, No. (%)                                                                            |                |                        |                                 |         |
| -Hypoxic-ischemic encephalopathy                                                                     | 129 (43%)      | 6 (35%)                | 123 (44%)                       | 0.7     |
| -Ischemic stroke                                                                                     | 78 (26%)       | 2 (12%)                | 76 (27%)                        |         |
| -Intracranial hemorrhage                                                                             | 54 (18%)       | 7 (41%)                | 47 (17%)                        |         |
| -Other                                                                                               | 38 (13%)       | 2 (12%)                | 36 (13%)                        |         |
| Worst EEG background (1 <sup>st</sup> 24hrs at study center), No. (%)                                |                |                        |                                 |         |
| -Normal                                                                                              | 25 (8%)        | 2 (12%)                | 23 (8%)                         | 0.5     |
| -Mild/moderately abnormal                                                                            | 197 (66%)      | 10 (59%)               | 187 (66%)                       |         |
| -Severely abnormal (burst suppression, depressed/undifferentiated, flat tracing)                     | 51 (17%)       | 5 (29%)                | 46 (16%)                        |         |
| -Status epilepticus at onset of recording                                                            | 24 (8%)        | 0                      | 24 (9%)                         |         |
| -Cannot assess                                                                                       | 2 (<1%)        | 0                      | 2 (<1%)                         |         |
| High seizure burden ( $\geq 7$ EEG seizures at the study center), No. (%)                            | 166 (56%)      | 10 (59%)               | 156 (55%)                       | 0.8     |
| Days of EEG seizures, median (IQR)                                                                   | 1 (1,2)        | 1(1,3)                 | 2 (1,2)                         | 0.4     |
| Phenobarbital initial loading ASM, No. (%)                                                           | 269 (90%)      | 15 (88%)               | 254 (90%)                       | 0.6     |
| Incomplete response to initial loading dose of medication, No. (%)                                   | 184 (62%)      | 10 (58%)               | 174 (62%)                       | 0.8     |
| Received $\geq 2$ ASM to treat neonatal seizures, No. (%)                                            | 159 (53%)      | 9 (52%)                | 150 (53%)                       | 0.98    |
| <i>Clinical course</i>                                                                               |                |                        |                                 |         |
| Complex medical diagnosis (congenital heart disease, ECMO, congenital diaphragmatic hernia), No. (%) | 34 (11%)       | 1 (6%)                 | 33 (12%)                        | 0.5     |
| Therapeutic hypothermia <sup>a</sup> , No. (%)                                                       | 86 (29%)       | 2 (12%)                | 84 (30%)                        | 0.1     |
| Abnormal neurologic exam at discharge <sup>a</sup> , No. (%)                                         | 92 (31%)       | 5 (29%)                | 87 (31%)                        | 0.9     |

**ASM** antiseizure medication; **NICU** neonatal intensive care unit; **PICU** pediatric intensive care unit; **CICU** cardiac intensive care unit; **EEG** electroencephalogram; **ECMO** extracorporeal membrane oxygenation

**eFigure.** Overlaid density plots of propensity scores by quintile for 303 infants whose antiseizure medications were discontinued vs. maintained upon discharge from the neonatal seizure admission.

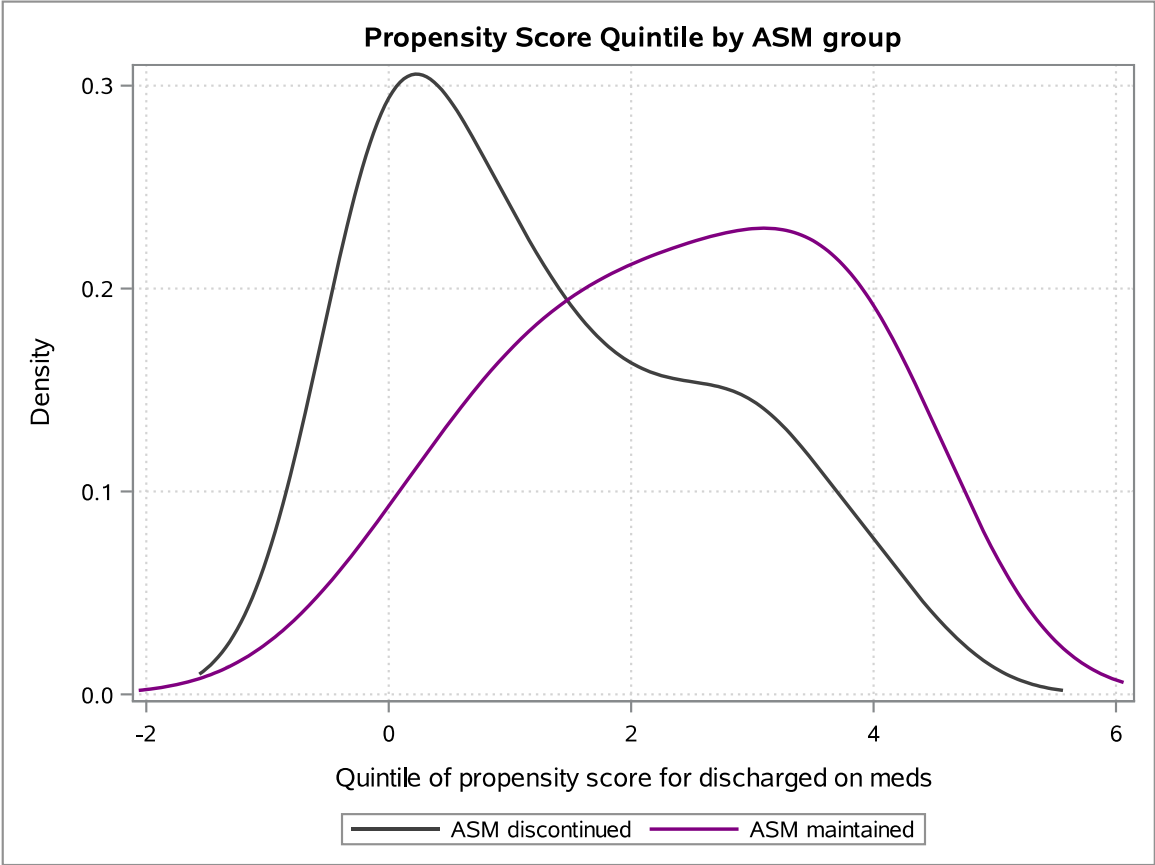

Supplement: jamaneurol-e211437-s001.pdf [file jamaneurol-e211437-s001.pdf]
